# Supplementary material
Source: PubMed Central journal article supplement (PMC2744447)
Supplement: NIHMS129781-supplement-supplement_1.pdf [file NIHMS129781-supplement-supplement_1.pdf]

# Supplemental Figure

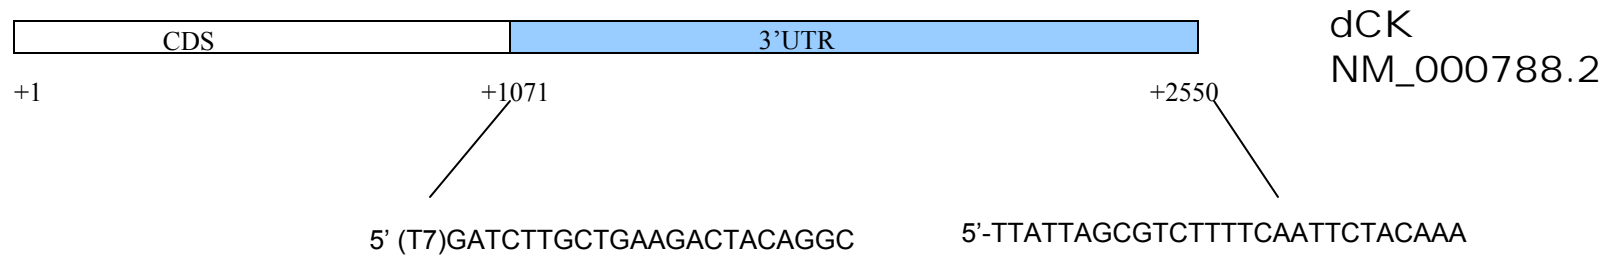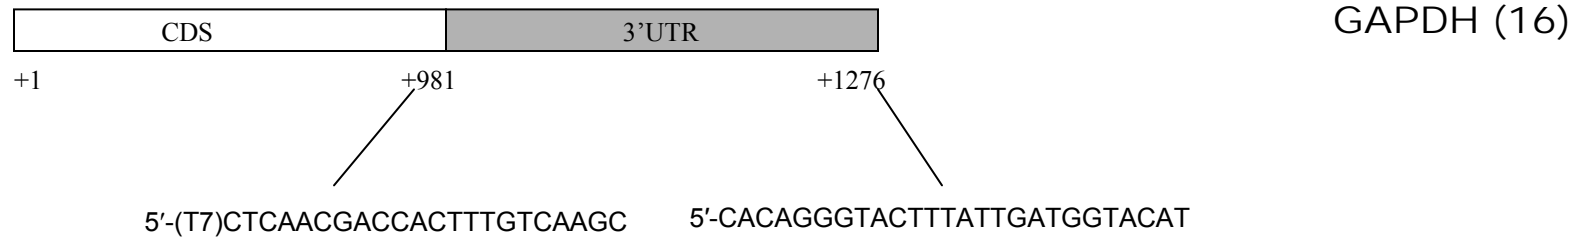

Supplemental figure: Depiction of UTR positions for dCK and GAPDH. Primer sets used for each probe are indicated (16).
